# Supplementary material for: Integrated Analysis of Cytokine Profiles in Malaria Patients Discloses Selective Upregulation of TGF-β1, β3, and IL-9 in Mild Clinical Presentation
Source: MDPI journal article supplement (doi:10.3390/ijms232012665), 2022-10-21
Supplement: s1 [file s1]

**Supplementary Table S1: Demographic and clinical details of study participants**

| Characteristics                                             | Control   | Uncomplicated<br>Malaria | Severe<br>anaemic<br>Malaria | T-test | P- Value |
|-------------------------------------------------------------|-----------|--------------------------|------------------------------|--------|----------|
| No. of participants                                         | 58        | 186                      | 80                           |        |          |
| Sex (M:F)                                                   | 29:29     | 100:86                   | 50:30                        |        |          |
| Age (years)                                                 | 30(10-50) | 35(5-65)                 | 36(5-68)                     |        |          |
| Mean of parasites density/ $\mu$ l blood                    | 0         | 3100                     | 9100                         | 12.356 | p<0.0001 |
| Upper 95% CI of mean of parasites<br>density/ $\mu$ l blood | 0         | 41002                    | 122185                       |        |          |
| Mean of Hemoglobin conc. (g/dl)                             | 14.02     | 13.5                     | 5.44                         |        |          |
|                                                             |           |                          |                              |        |          |

**Supplementary Table S2: Cytokines Mean  $\pm$  SEM**

| Cytokines &<br>Immunoglobulins | Malaria clinical manifestations | Mean $\pm$ SEM    |
|--------------------------------|---------------------------------|-------------------|
| IL-4                           | Control                         | 95 $\pm$ 105      |
|                                | Mild infection                  | 13234 $\pm$ 63.95 |
|                                | Severe infection                | 1045 $\pm$ 60.62  |
| IL-6                           | Control                         | 310 $\pm$ 162     |
|                                | Mild infection                  | 772 $\pm$ 41.79   |
|                                | Severe infection                | 4139 $\pm$ 291.8  |
| IL-7                           | Control                         | 52 $\pm$ 20       |
|                                | Mild infection                  | 1705 $\pm$ 45.81  |
|                                | Severe infection                | 643 $\pm$ 30.58   |
| IL-9                           | Control                         | 1676 $\pm$ 560    |
|                                | Mild infection                  | 6365 $\pm$ 134.7  |

|        |                  |              |
|--------|------------------|--------------|
|        | Severe infection | 1876 ± 57.14 |
| IL-10  | Control          | 462 ± 218    |
|        | Mild infection   | 3037 ± 130.2 |
|        | Severe infection | 1239 ± 67.83 |
| IL-13  | Control          | 720 ± 360    |
|        | Mild infection   | 1892 ± 40.62 |
|        | Severe infection | 6149 ± 143.8 |
| IL-17  | Control          | 67 ± 38      |
|        | Mild infection   | 2070 ± 62.76 |
|        | Severe infection | 839 ± 50.79  |
| IL-27  | Control          | 922 ± 1007   |
|        | Mild infection   | 3869 ± 2698  |
|        | Severe infection | 1776 ± 1698  |
| TGF-β1 | Control          | 174 ± 197    |
|        | Mild infection   | 1577 ± 64.23 |
|        | Severe infection | <20          |
| TGF-β3 | Control          | <20          |
|        | Mild infection   | 4209 ± 173.5 |
|        | Severe infection | 391± 41.21   |
| IFNγ   | Control          | 209 ± 90     |
|        | Mild infection   | 476 ± 23.17  |
|        | Severe infection | 2713 ± 89.38 |
| TNF    | Control          | 208 ± 128    |
|        | Mild infection   | 377 ± 17     |
|        | Severe infection | 3433 ± 107   |
